# Supplementary material for: Sex Differences in Serious Adverse Events Reported Following Booster Doses of COVID-19 Vaccination in Thailand: A Countrywide Nested Unmatched Case-Control Study
Source: MDPI journal article supplement (doi:10.3390/vaccines11121772), 2023-11-28
Supplement: s1 [file s1]

**Table S1** Criteria of serious adverse events based on the AEFI-DDC program (21)

|                                                                                                                                                                                                                                                                                                                                                                                                                                                                                                                                                                                                                                                                                                                                                                                                                            |
|----------------------------------------------------------------------------------------------------------------------------------------------------------------------------------------------------------------------------------------------------------------------------------------------------------------------------------------------------------------------------------------------------------------------------------------------------------------------------------------------------------------------------------------------------------------------------------------------------------------------------------------------------------------------------------------------------------------------------------------------------------------------------------------------------------------------------|
| 1. Death                                                                                                                                                                                                                                                                                                                                                                                                                                                                                                                                                                                                                                                                                                                                                                                                                   |
| <p>2. Life-threatening diseases</p> <p>The following diseases were life-threatening if they were following COVID-19 vaccination:</p> <ul style="list-style-type: none"> <li>- Anaphylaxis, Stevens-Johnson syndrome</li> <li>- Acute myocarditis, acute pericarditis, acute myocardial infarction, hypertensive emergency, ischemic heart disease, heart failure</li> <li>- Acute respiratory distress syndrome (ARDS)</li> <li>- Transverse myelitis, Guillain Barre Syndrome (GBS), acute disseminated encephalomyelitis (ADEM), Encephalitis, Stroke, Meningoencephalitis, Meningitis, Bell's palsy</li> <li>- Serious immune-mediated diseases such as immune thrombocytopenic purpura (ITP)</li> <li>- Vaccine induced-immune thrombotic thrombocytopenia (VITT), pulmonary embolism, deep vein thrombosis</li> </ul> |
| 3. Resulting in permanently handicapped                                                                                                                                                                                                                                                                                                                                                                                                                                                                                                                                                                                                                                                                                                                                                                                    |
| <p>4. Congenital anomaly</p> <p>*Not included because of unknown pregnancy status</p>                                                                                                                                                                                                                                                                                                                                                                                                                                                                                                                                                                                                                                                                                                                                      |
| <p>5. Prolong admission for vaccine-related adverse events in the hospital above 3 days</p> <p>*Not included because of unable to confirm causality from the vaccines</p>                                                                                                                                                                                                                                                                                                                                                                                                                                                                                                                                                                                                                                                  |

**Table S2** Definition and example of booster regimens among study population

| Booster regimens          | Definition                                                                | Most common | n (%) (N=2,450) |
|---------------------------|---------------------------------------------------------------------------|-------------|-----------------|
| Heterologous doses        | Brand of the booster dose differs from the first difference primary doses | SI-AZ-PZ    | 559 (22.8%)     |
|                           |                                                                           | SI-AZ-MO    | 74 (3.02%)      |
| Heterologous booster dose | Brand of the booster dose differs from the first same primary doses       | AZ-AZ-PZ    | 579 (23.6%)     |
|                           |                                                                           | SI-SI-PZ    | 279 (11.3%)     |
|                           |                                                                           | SI-SI-AZ    | 226 (9.2%)      |
|                           |                                                                           | AZ-AZ-MO    | 135 (5.5%)      |
|                           |                                                                           | SI-SI-MO    | 119 (4.7%)      |
| Homologous booster dose   | Brand of the booster dose is same as the first same primary doses         | SI-AZ-AZ    | 232 (9.5%)      |
|                           |                                                                           | PZ-PZ-PZ    | 110 (4.5%)      |

AZ:AstraZeneca, PZ:Pfizer, MO:Moderna, SI: Sinovac or Sinopharm

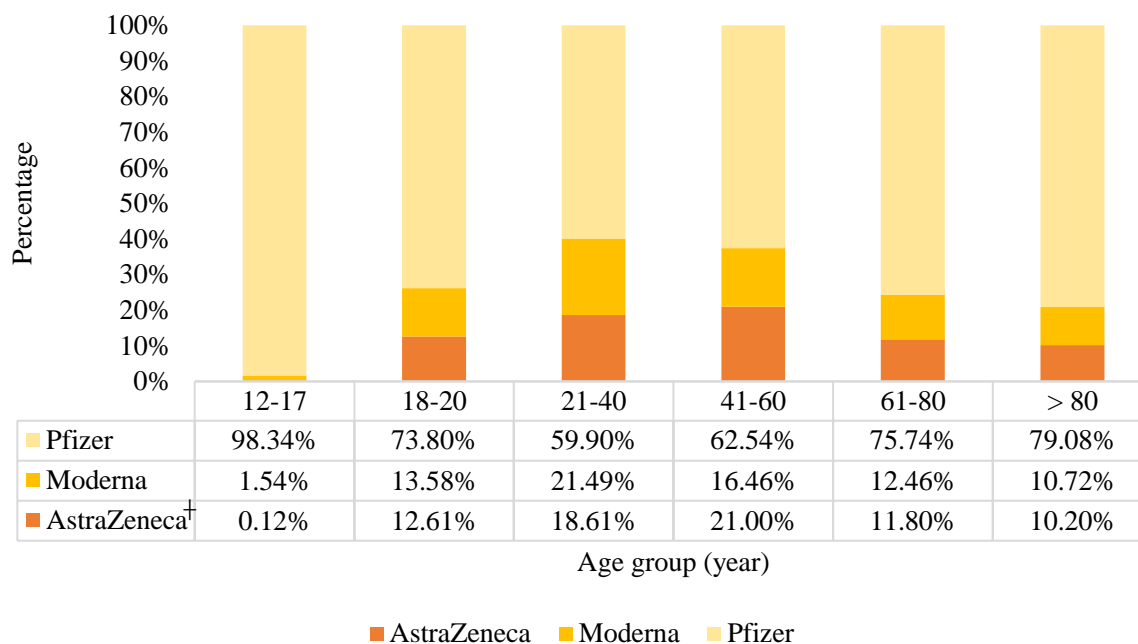

<sup>†</sup>AstraZeneca was not recommended in Thailand for use in people aged 12–17; however, some unintentional misuse occurred.

**Figure S1** Percentage of brands of COVID-19 vaccine distribution of booster doses by age groups in source population (N= 33,394,922)

**Table S3** Characteristic of the study population (n= 2,450: case 490, control 1960)

| <i>Variables</i>                                   | <i>Categories</i>         | <i>Case (n=490)</i> | <i>Control (n=1,960)</i> | <i>p-value*</i> |
|----------------------------------------------------|---------------------------|---------------------|--------------------------|-----------------|
| <i>Sex</i>                                         | Male                      | 245 (50.0%)         | 888 (45.3%)              | 0.06            |
|                                                    | Female                    | 245 (50.0%)         | 1072 (54.7%)             | -               |
| <i>Age. median. year (IQR)</i>                     | Cont.                     | 55 (40, 69)         | 44 (31, 57)              | <b>&lt;0.01</b> |
| <i>Age group</i>                                   | 12-20 years               | 17 (3.5%)           | 123 (6.3%)               | <b>0.02</b>     |
|                                                    | 21-30 years               | 56 (11.4%)          | 361 (18.4%)              | <b>&lt;0.01</b> |
|                                                    | 31-40 years               | 52 (10.6%)          | 377 (19.2%)              | <b>&lt;0.01</b> |
|                                                    | 41-50 years               | 78 (15.9%)          | 404 (20.6%)              | <b>0.02</b>     |
|                                                    | 51-60 years               | 93 (19.0%)          | 298 (15.2%)              | <b>0.03</b>     |
|                                                    | >60 years                 | 190 (38.8%)         | 397 (20.3%)              | <b>&lt;0.01</b> |
|                                                    | Missing                   | 4 (0.8%)            | 0 (0.0%)                 | -               |
|                                                    | AstraZeneca <sup>†</sup>  | 138 (28.2%)         | 343 (17.5%)              | <b>&lt;0.01</b> |
| <i>Brands of booster vaccine</i>                   | Moderna                   | 41 (8.4%)           | 333 (17.0%)              | <b>&lt;0.01</b> |
|                                                    | Pfizer                    | 311 (63.5%)         | 1284 (65.5%)             | 0.40            |
| <i>Underlying diseases</i>                         | Metabolic syndromes       | 60 (12.2%)          | 171 (8.7%)               | <b>0.02</b>     |
|                                                    | Other diseases            | 13 (2.7%)           | 50 (2.6%)                | 0.90            |
|                                                    | Unreported                | 417 (85.1%)         | 1739 (88.7%)             | <b>0.03</b>     |
| <i>Occupation</i>                                  | Frontline workers         | 86 (17.6%)          | 109 (5.6%)               | <b>&lt;0.01</b> |
|                                                    | Non-frontline workers     | 404 (82.4%)         | 1851 (94.4%)             | -               |
| <i>Regimens of booster dose</i>                    | Heterologous doses        | 116 (23.7%)         | 534 (27.2%)              | 0.11            |
|                                                    | Heterologous booster dose | 294 (60.0%)         | 1064 (54.3%)             | <b>0.02</b>     |
|                                                    | Homologous booster dose   | 80 (16.3%)          | 362 (18.5%)              | 0.27            |
| <i>Period after booster dose policy initiation</i> | <3 month                  | 70 (14.3%)          | 27 (1.4%)                | <b>&lt;0.01</b> |
|                                                    | 3-6 months                | 120 (24.5%)         | 405 (20.7%)              | 0.07            |
|                                                    | 6-9 months                | 237 (48.4%)         | 1184 (60.4%)             | <b>&lt;0.01</b> |
|                                                    | >9 months                 | 63 (12.9%)          | 344 (17.6%)              | <b>0.01</b>     |
| <i>Period after vaccine introduction</i>           | <3 month                  | 56 (11.4%)          | 198 (10.1%)              | 0.39            |
|                                                    | 3-6 months                | 218 (44.5%)         | 799 (40.8%)              | 0.14            |
|                                                    | 6-9 months                | 126 (25.7%)         | 568 (29.0%)              | 0.15            |
|                                                    | >9 months                 | 90 (18.4%)          | 395 (20.2%)              | 0.38            |
| <i>Dose interval</i>                               | <3 month                  | 89 (18.2%)          | 194 (9.9%)               | <b>&lt;0.01</b> |
|                                                    | 3-6 months                | 333 (68.0%)         | 1,489 (76.0%)            | <b>&lt;0.01</b> |
|                                                    | >6 months                 | 68 (13.9%)          | 277 (14.1%)              | 0.89            |

\*Pearson's chi-squared test for categorical variables, Wilcoxon rank-sum test for continuous variables

Data are n (%), unless otherwise indicated

<sup>†</sup>AstraZeneca was not recommended in Thailand for use in people aged 12–17; however, some unintentional misuse occurred.

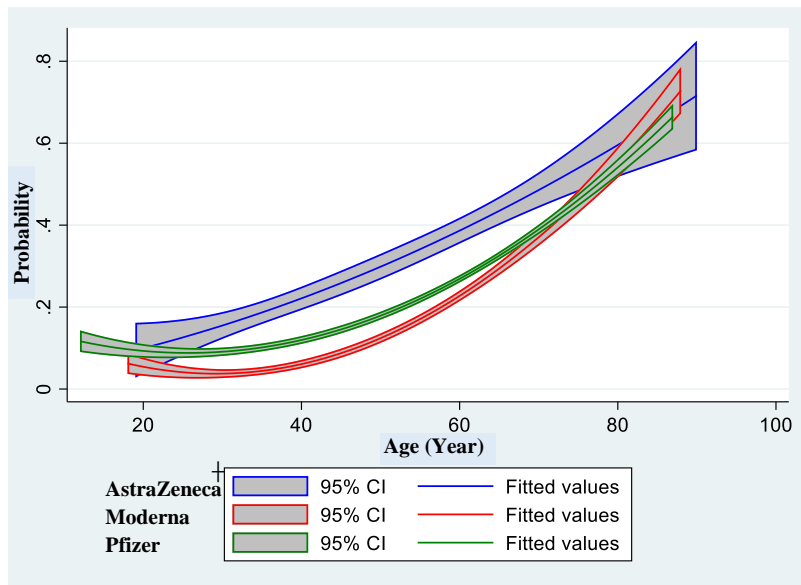

**Male**

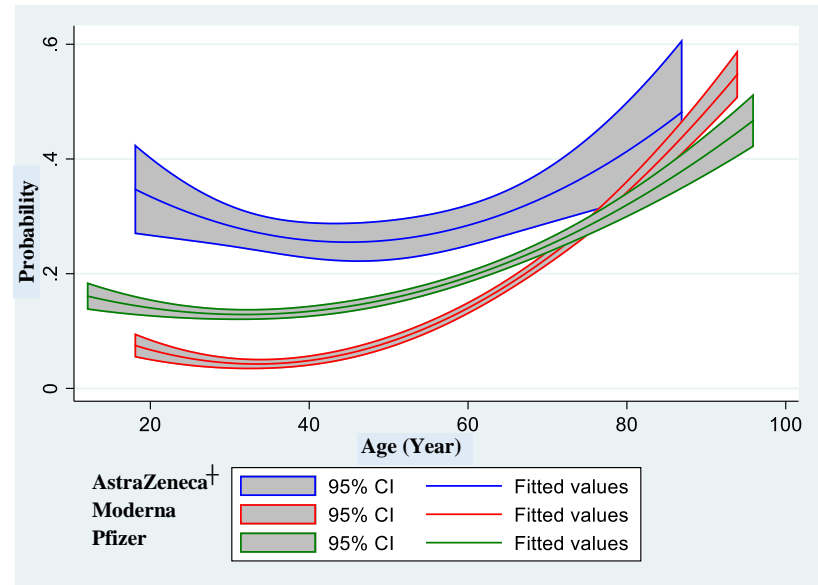

**Female**

<sup>†</sup>AstraZeneca was not recommended in Thailand for use in people aged 12–17; however, some unintentional misuse occurred.

**Figure S2** Probability of reported SAE after a booster dose of COVID-19 vaccination across ages stratified by brands of booster dose among males (left) and females (right)
